# Supplementary material for: Chemokine CXCL10 Modulates the Tumor Microenvironment of Fibrosis-Associated Hepatocellular Carcinoma
Source: MDPI journal article supplement (doi:10.3390/ijms23158112), 2022-07-23
Supplement: s1 [file s1]

**Table S1.** Key resources table.

| REAGENT or RESOURCE                                       | SOURCE              | IDENTIFIER                          |
|-----------------------------------------------------------|---------------------|-------------------------------------|
| <b>Antibodies</b>                                         |                     |                                     |
| Anti-Rabbit IgG (Heavy and Light Chains)- Alexa Fluor 488 | eBioscience         | #Cat A-11008,<br>RRID:AB_143165     |
| Anti-Rabbit IgG (Heavy and Light Chains)- Alexa Fluor 546 | eBioscience         | #Cat A-11010,<br>RRID:AB_2534077    |
| Anti-Rat IgG (Heavy and Light Chains)- Alexa Fluor 488    | eBioscience         | #Cat A-21208,<br>RRID:AB_141709     |
| Anti-Rat IgG (Heavy and Light Chains)- Alexa Fluor 546    | eBioscience         | #Cat A-11081,<br>RRID:AB_141738     |
| aSMA (TSA Dye Cy 3)                                       | Abcam               | #Cat ab32575<br>RRID:AB_722538      |
| B220-APC-Cy7 (CD45R)                                      | eBioscience         | #Cat A15399,<br>RRID:AB_2534413     |
| Biotin anti-mouse Lineage Panel                           | Biolegend           | #Cat 133307,<br>RRID:AB_11124348    |
| Biotinylated Goat anti Rabbit IgG Antibody                | Vector Laboratories | #Cat BA-1000,<br>RRID:AB_2313606    |
| CD103-PE                                                  | BD Bioscience       | #Cat 557495,<br>RRID:AB_396732      |
| CD115-APC                                                 | eBioscience         | #Cat 17-1152-82,<br>RRID:AB_1210789 |
| CD11b-eFluor450                                           | eBioscience         | #Cat 48-0112-82,<br>RRID:AB_1582236 |
| CD11b-PE                                                  | eBioscience         | #Cat 12-0112-82,<br>RRID:AB_2734869 |
| CD11c-PE-Cy7                                              | eBioscience         | #Cat 25-0114-82,<br>RRID:AB_469590  |
| CD25-Alexa Fluor 700                                      | eBioscience         | #Cat 56-0251-80,<br>RRID:AB_891424  |
| CD3-PE-Cy7                                                | eBioscience         | #Cat 25-0031-82,<br>RRID:AB_469572  |
| CD4 (TSA Dye Cy 3.5)                                      | Abcam               | #Cat ab196159                       |
| CD45-BV510                                                | BD Bioscience       | #Cat 563891,<br>RRID:AB_2734134     |
| CD4-FITC                                                  | eBioscience         | #Cat 11-0041-85,<br>RRID:AB_464893  |
| CD62L-APC-Cy7                                             | eBioscience         | #Cat 47-0621-82,<br>RRID:AB_1603256 |
| CD8 (TSA Dye Cy 5)                                        | Bioss               | #Cat bs-0648R<br>RRID:AB_10857537   |
| CD86-Biotin                                               | eBioscience         | #Cat 13-0862-82,<br>RRID:AB_466525  |
| CD8a-PerCP-Cy5.5                                          | eBioscience         | #Cat 45-0081-82                     |

|                                                      |                             |                                      |
|------------------------------------------------------|-----------------------------|--------------------------------------|
| Cleaved Caspase 3                                    | Cell Signaling              | #Cat 9661S,<br>RRID:AB_2341188       |
| Cleaved Caspase 3 (TSA Dye Cy FITC)                  | Abcam                       | #Cat ab49822<br>RRID:AB_868673       |
| Collagen IV (TSA Dye Cy 5.5)                         | Novotec                     | #Cat 20451<br>RRID:AB_10576569       |
| F4/80-APC                                            | eBioscience                 | #Cat 17-4801-82,<br>RRID:AB_2784648  |
| F4/80-PE-Cy7                                         | eBioscience                 | #Cat 25-4801-82,<br>RRID:AB_2784648  |
| FoxP3-APC                                            | eBioscience                 | #Cat 17-5773-82,<br>RRID:AB_469457   |
| Goat anti Rabbit IgG HRP polyclonal Antibody         | Dako                        | #Cat P0448,<br>RRID:AB_2617138       |
| Ki-67                                                | Cell Signaling              | #Cat 12202S,<br>RRID:AB_2620142      |
| Ki67 (TSA Dye Cy FITC)                               | Abcam                       | #Cat ab15580<br>RRID:AB_443209       |
| Ly6C-PerCP-Cy5.5                                     | BD Bioscience               | #Cat 560525,<br>RRID:AB_1727558      |
| Ly6G-FITC                                            | eBioscience                 | #Cat 11-9668-80,<br>RRID:AB_2572531  |
| MHCII-Alexa Fluor 700                                | eBioscience                 | #Cat 56-5321-82,<br>RRID:AB_494009   |
| NK1.1-PE                                             | BD Bioscience               | #Cat 553165,<br>RRID:AB_394677       |
| β-Actin                                              | Cell Signaling              | #Cat 8457S,<br>RRID:AB_10950489      |
| Streptavidin eFluor® 450                             | eBioscience                 | #Cat 48-4317-82,<br>RRID:AB_10359737 |
| VEGF-R2                                              | Cell Signaling              | #Cat 2479,<br>RRID:AB_2212507        |
| <b>Chemicals, peptides, and recombinant proteins</b> |                             |                                      |
| 40/70 Percoll                                        | GE Healthcare Life Sciences | #Cat 17-0891-01                      |
| 7-Amino-Actinomycin D (7AAD)                         | Sigma-Aldrich               | #Cat A9400                           |
| Accutase Cell Detachment Solution                    | Sigma-Aldrich               | #Cat A6964                           |
| Albumin bovine (BSA) Fraction V                      | Biomol                      | #Cat 01400.100                       |
| Antigen unmasking Solution                           | Vector Laboratories         | #Cat H-3300,<br>RRID:AB_2336226      |
| APC Calibrite beads                                  | BD Biosciences              | #Cat 340487,<br>RRID:AB_2868735      |
| Avidin/Biotin Blocking Kit                           | Vector Laboratories         | #Cat SP-2001,<br>RRID:AB_2336231     |

|                                                                                                  |                                  |                                                             |
|--------------------------------------------------------------------------------------------------|----------------------------------|-------------------------------------------------------------|
| Cell Proliferation ELISA, BrdU (colorimetric)                                                    | Roche                            | #Cat 11647229001                                            |
| Chloroform p.A.                                                                                  | Carl Roth                        | #Cat 3313.1                                                 |
| Collagenase Typ 4 CLS-4                                                                          | Worthington                      | #Cat LS004189                                               |
| Count bright absolute counting beads                                                             | Thermo<br>Fisher                 | #Cat C36950                                                 |
| <b>Critical commercial assays</b>                                                                |                                  |                                                             |
| Antibody Diluent/Block                                                                           | Perkin Elmer                     | #Cat ARD1001EA                                              |
| AR6 Buffer                                                                                       | Perkin Elmer                     | #Cat AR600125ML                                             |
| CXCR3 Inhibitor/(±)-AMG 487                                                                      | Tocris<br>Bioscience             | #Cat 4487/10                                                |
| Diethylnitrosamine                                                                               | Sigma-<br>Aldrich                | #Cat N0756                                                  |
| DMEM, w: 4.5 g/L Glucose, w: L-Glutamine, w/o:<br>Sodium pyruvate, w: 3.7 g/L NaHCO <sub>3</sub> | PAN<br>BIOTECH                   | #Cat P04-03550                                              |
| DMSO                                                                                             | Sigma-<br>Aldrich                | #Cat D2438                                                  |
| DNase1                                                                                           | Roche                            | #Cat 10104159001                                            |
| Dulbecco's Phosphate Buffered Saline (PBS), w/o: Ca<br>and Mg                                    | PAN<br>BIOTECH                   | #Cat P04-36500                                              |
| EDTA solution pH 8,0                                                                             | PanReac<br>AppliChem             | #Cat A4892                                                  |
| Fixable Viability Dye eFluor450                                                                  | eBioscience                      | #Cat 65-0863-18                                             |
| Formaldehyde solution 4 % buffered                                                               | Otto Fischar<br>GmbH & Co.<br>KG | #Cat 27280                                                  |
| FoxP3 Trans. Staining Buffer                                                                     | eBioscience                      | #Cat 00-5523-00                                             |
| GoTaq qPCR Master Mix                                                                            | Promega                          | #Cat A6002                                                  |
| Hemacolor quick stain kit (1-3)                                                                  | Merck                            | #Cat 1.119.562.500<br>#Cat 1.119.572.500<br>#Cat 1119552500 |
| Hepatotoxic carbon tetrachloride                                                                 | Sigma-<br>Aldrich                | #Cat 289116                                                 |
| Hydrogen chloride (HCL) 1M                                                                       | PanReac<br>AppliChem             | #Cat 1.810.211.211                                          |
| Hydrogen peroxide 30% p.A.                                                                       | Merck                            | #Cat 107209                                                 |
| Magnesium chloride hexahydrate                                                                   | Carl Roth                        | #Cat 2189.2                                                 |
| Mowiol 4-88                                                                                      | Carl Roth                        | #Cat 0713.2                                                 |
| NaCl                                                                                             | Carl Roth                        | #Cat HN00.2                                                 |
| Natriumazid                                                                                      | Carl Roth                        | #Cat K305.1                                                 |
| Normal mouse serum                                                                               | Abcam                            | #Cat ab7486                                                 |
| Penicillin-streptomycin                                                                          | Life<br>Technologies             | #Cat 15140-122                                              |
| Peroxidase Substrate Kit DAB                                                                     | Vector<br>Laboratories           | #Cat SK-4100,<br>RRID:AB_2336382                            |
| Pierce BCA Protein Assay Kit                                                                     | Thermo<br>Fisher                 | #Cat 23227                                                  |
| Prigrow X.1 Medium                                                                               | abm                              | # Cat TM010                                                 |

|                                                                                |                                         |                                      |
|--------------------------------------------------------------------------------|-----------------------------------------|--------------------------------------|
| Proteinase K                                                                   | Carl Roth                               | #Cat 7528.1                          |
| RBC lysis buffer (10x)                                                         | BioLegend                               | #Cat 420301                          |
| Recombinant murine IP-10/CXCL10                                                | PeproTech                               | #Cat 250-16                          |
| Recombinant murine MIG/CXCL9                                                   | PeproTech                               | #Cat 250-18                          |
| Roti®-Histokitt (mounting medium for histology)                                | Carl Roth                               | #Cat 6638.1                          |
| RPMI 1640, w: L-Glutamine, w: 2.0 g/L NaHCO <sub>3</sub>                       | PAN<br>BIOTECH                          | #Cat P04-16500                       |
| Sera Plus, EU approved regions, special processed FBS, 0.2 µm sterile filtered | PAN<br>BIOTECH                          | #Cat P30-3702                        |
| Sirius Red F3B                                                                 | Sigma-<br>Aldrich                       | #Cat 365548                          |
| Sodium Hydroxide solution (1 M) for molecular biology                          | PanReac<br>AppliChem                    | #Cat A6579                           |
| Tissue-Tek O.C.T Compound                                                      | Sakura                                  | #Cat 4583                            |
| TRIS Pufferan 99,9%                                                            | Carl Roth                               | #Cat 4855.1                          |
| Triton X                                                                       | Merck                                   | #Cat 108603                          |
| TSA Cyanine 3                                                                  | Perkin<br>Elmer/<br>Akoya<br>Bioscience | #Cat NEL704A001KT<br>RRID:AB_2572409 |
| TSA Cyanine 3.5                                                                | Perkin<br>Elmer/<br>Akoya<br>Bioscience | #Cat NEL763001KT                     |
| TSA Cyanine 5                                                                  | Perkin<br>Elmer/<br>Akoya<br>Bioscience | #Cat NEL705A001KT                    |
| TSA Cyanine 5.5                                                                | Perkin<br>Elmer/<br>Akoya<br>Bioscience | #Cat NEL766001KT                     |
| TSA Fluorescein                                                                | Perkin<br>Elmer/<br>Akoya<br>Bioscience | #Cat NEL701A001KT                    |
| Tween 20                                                                       | Carl Roth                               | #Cat 9127.1                          |
| Vecta shield Mounting Medium with DAPI                                         | Vector<br>Laboratories                  | #Cat H-1200,<br>RRID:AB_2336790      |
| Xylol                                                                          | Fischar                                 | #Cat 27404                           |
| <b>Experimental models: Cell lines</b>                                         |                                         |                                      |
| Human HUH7 cells / well differentiated hepatocyte-derived carcinoma cell line  |                                         | P+4, RRID:CVCL_0327                  |
| HUVEC / human umbilical vein endothelial cells                                 |                                         | P+X,<br>RRID:CVCL_LF80               |

|                                                                                |                                             |                     |
|--------------------------------------------------------------------------------|---------------------------------------------|---------------------|
| Mouse: <i>Cxcl10</i> <sup>-/-</sup> and WT (C57Bl/6J) littermates              | University hospital Aachen, Animal facility | [15]                |
| <b>Oligonucleotides</b>                                                        |                                             |                     |
| <i>18S</i><br>CTCAACACGGGAAACCTCAC (for)<br>CGCTCCACCAACTAAGAACG (rev)         | N/A                                         | Eurofins MWG Operon |
| <i>Afp</i><br>AGCAAAGCTGCGCTCTCTAC (for)<br>AGGGGCTTTCCTCGTGTAAC (rev)         | N/A                                         | Eurofins MWG Operon |
| <i>Ctla-4</i><br>TTTTGTAGCCCTGCTCACTCT (for)<br>CTGAAGGTTGGGTCACCTGTA (rev)    | N/A                                         | Eurofins MWG Operon |
| <i>Cxcl10</i><br>CCAAGTGCTGCCGTCATTTTC (for)<br>GGCTCGCAGGGATGATTCAA (rev)     | N/A                                         | Eurofins MWG Operon |
| <i>Cxcl9</i><br>TAGGCAGGTTTGATCTCCGT (for)<br>CGATCCACTACAAATCCCTCA (rev)      | N/A                                         | Eurofins MWG Operon |
| <i>Cxcr3</i><br>AGAATCATCCTGGTCTGAGACAA (for)<br>AAGATAGGGCATGGCAGCTA (rev)    | N/A                                         | Eurofins MWG Operon |
| <i>Hgf</i><br>GATGAGTGTGCCAACAGGTG (for)<br>GGTCAAATTCATGGCCAAAC (rev)         | N/A                                         | Eurofins MWG Operon |
| <i>Il10</i><br>GCCAAGCCTTATCGGAAATGA (for)<br>CTTGATTCTGGGCCATGCT (rev)        | N/A                                         | Eurofins MWG Operon |
| <i>Il12</i><br>CTCTGAATCATAATGGCGAGACT (for)<br>TTCATCTGTAAAGGTCTGCTTC (rev)   | N/A                                         | Eurofins MWG Operon |
| <i>Il13</i><br>TGGATTCCCTGACCAACATCTC (for)<br>GGTTACAGAGGCCATGCAATATC (rev)   | N/A                                         | Eurofins MWG Operon |
| <i>Il4</i><br>AAACTCCATGCTTGAAGAAGAACT (for)<br>CTACGAGTAATCCATTTGCATGAT (rev) | N/A                                         | Eurofins MWG Operon |
| <i>TTAGATGTGGAGCAACTTGGAAAT</i> (for)<br><i>CATTCTTTGCACAGGATATCACA</i> (rev)  | N/A                                         | Eurofins MWG Operon |
| <i>Pd-l1</i><br>GCTCCAAAGGACTTGTACGTG (for)<br>TGATCTGAAGGGCAGCATTTTC (rev)    | N/A                                         | Eurofins MWG Operon |
| <i>GAGCCCAATCACGTTTCAGTTT</i> (for)<br><i>TCCTTCCTGCTTCTTGCTAGCT</i> (rev)     | N/A                                         | Eurofins MWG Operon |

|                                                                             |                                                         |                                                                                                                                                                   |
|-----------------------------------------------------------------------------|---------------------------------------------------------|-------------------------------------------------------------------------------------------------------------------------------------------------------------------|
| <i>Tgfb</i><br>GAAGGACCTGGGTTGGAAGT (for)<br>GTTGGTTGTAGAGGGCAAGG (rev)     | N/A                                                     | Eurofins MWG<br>Operon                                                                                                                                            |
| CGCGAGGTTGTTTAGAGTAGCA (for)<br>TCAGTCCAAGCAAACTCTCTGAT (rev)               | N/A                                                     | Eurofins MWG<br>Operon                                                                                                                                            |
| CGGAAGATTAGGGTTGTTTCTG (for)<br>TCCACAGCAGTCAAACATATCC (rev)                | N/A                                                     | Eurofins MWG<br>Operon                                                                                                                                            |
| <i>Vegf-r2</i><br>GCCCTGCTGTGGTCTCACTAC (for)<br>CAAAGCATTGCCCATTCGAT (rev) | N/A                                                     | Eurofins MWG<br>Operon                                                                                                                                            |
| <b>Software and algorithms</b>                                              |                                                         |                                                                                                                                                                   |
| FlowJo software v10.6.0                                                     | FLOWJO<br>LLC                                           | <a href="https://www.flowjo.com/solutions/flowjo">https://www.flowjo.com/solutions/flowjo</a>                                                                     |
| Fiji - Image J                                                              | Schindelin <i>et al.</i> , 2012 [21]                    | <a href="https://imagej.net/Fiji/Downloads">https://imagej.net/Fiji/Downloads</a>                                                                                 |
| Kaplan-Meier Plotter online tool                                            | Menyhart O <i>et al.</i> R Soc Open Sci 2018;5:181006 . | This paper                                                                                                                                                        |
| GraphPad Prism 9.0                                                          | GraphPad                                                | <a href="https://www.graphpad.com/scientific-software/prism/">https://www.graphpad.com/scientific-software/prism/</a>                                             |
| BD FACSDiva V10 software                                                    | BD Bioscience                                           | <a href="https://www.bdbiosciences.com/en-au/products/software/flowjo-v10-software">https://www.bdbiosciences.com/en-au/products/software/flowjo-v10-software</a> |
| Vectra 3.0 Automated Quantitative Pathology Imaging System                  | PerkinElmer                                             |                                                                                                                                                                   |
| R                                                                           | RStudio                                                 | <a href="https://www.rstudio.com/">https://www.rstudio.com/</a>                                                                                                   |

**A**

## InForm Analysis

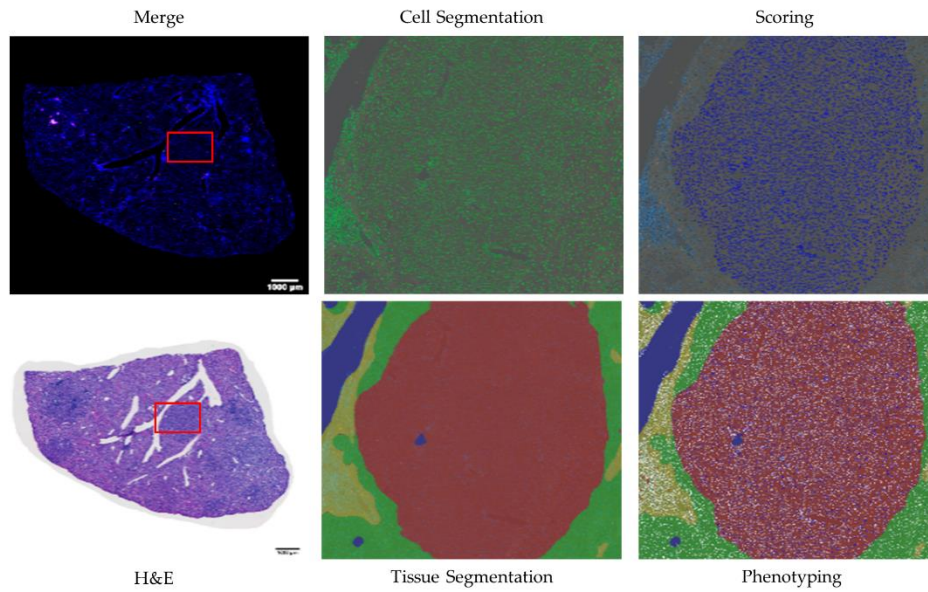

**B**

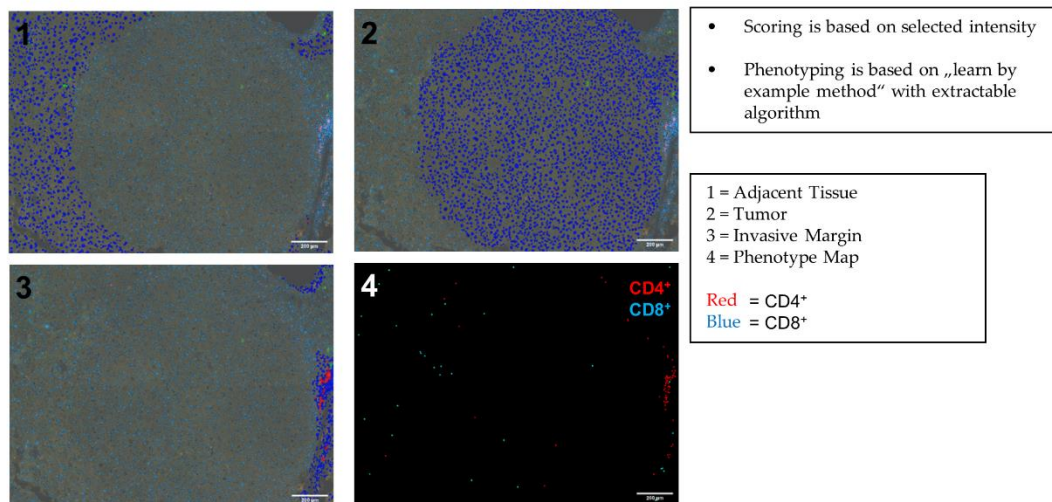

**Figure S1.** Multiplex staining InForm Analysis, Phenotyping and Scoring (A) InForm analysis of Multiplex staining. Representative multiplex staining, H&E staining, cell and tissue segmentation image as well as scoring and and phenotyping of tumorigenic liver tissue, scale bar 1000 µm (B) Exemplary scoring of CD4+ and cleaved Caspase 3+ cells from the cleaved Caspase 3 multiplex staining for inForm analysis. Positivity threshold was manually set for cells to be detected as CD4 (red) or cleaved Caspase 3 (green) positive. Scoring was done for the different tissue regions: (1) adjacent tissue, (2) tumor tissue and (3) invasive margin. scale bar 200 µm

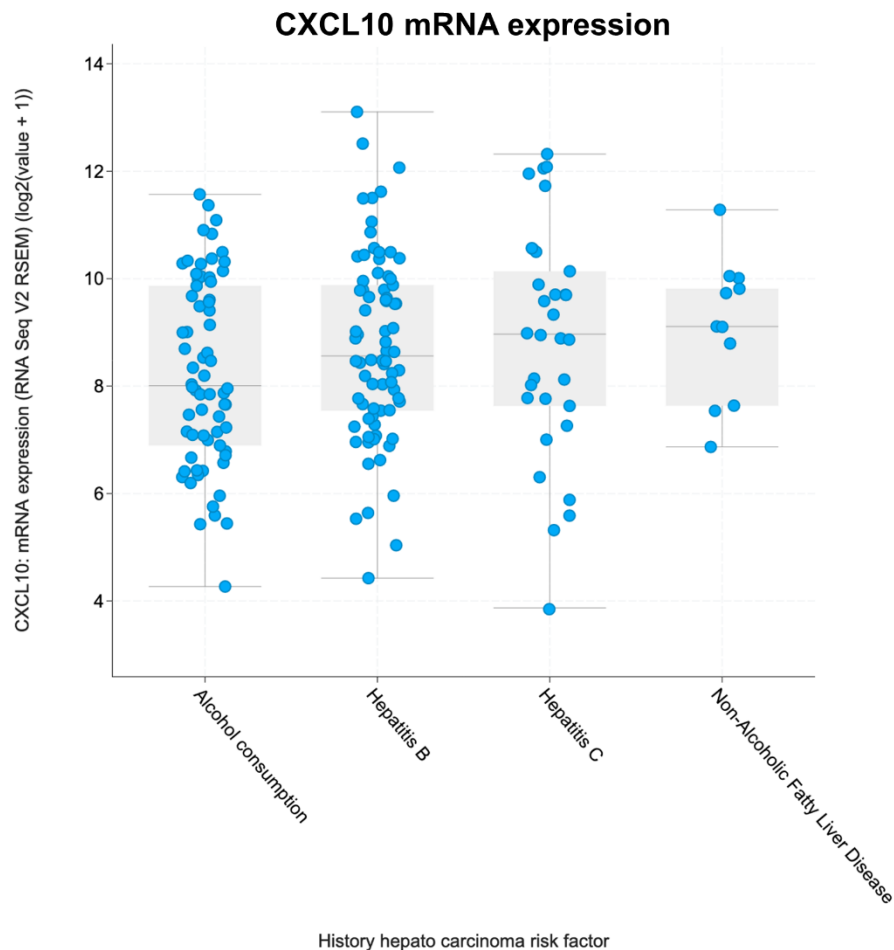

**Figure S2. Intratumoral Cxcl10 mRNA expression stratified depending on HCC risk factor in a cohort of 371 HCC patients (TCGA firehose legacy datasets), plot is generated using the open-access cBioPortal (Cerami et al. The cBio Cancer Genomics Portal: An Open Platform for Exploring Multidimensional Cancer Genomics Data. Cancer Discovery. May 2012 2; 401.; Gao et al. Integrative analysis of complex cancer genomics and clinical profiles using the cBioPortal. Sci. Signal. 6, pl1 2013)**



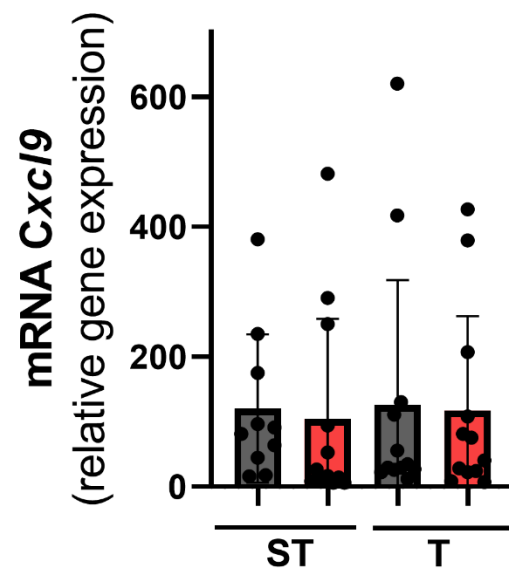

**Figure S3.** mRNA expression level Cxcl9 was quantified by qRT-PCR of non-tumor liver surrounding tissue (ST) as well as tumor tissue (T) of WT and *Cxcl10*<sup>-/-</sup> mice. The amount of mRNA expression was normalized to the expression of *18S*. Data are expressed as mean  $\pm$  SEM.
